# Supplementary material for: Pilot study to investigate differences in middle molecules, oxidative stress and markers of peripheral vascular disease in patients treated by high flux haemodialysis and haemodiafiltration
Source: PLoS One. 2021 Oct 6;16(10):e0258223. doi: 10.1371/journal.pone.0258223 (PMC8494338; doi:10.1371/journal.pone.0258223)
Supplement: S1 Data — (XLSX) [file pone.0258223.s005.xlsx]

## Sheet: IMAR_HDF
mode	genderf1m0	Smoker02	Vegetarian	Vegetarian0	DM	HTN	frequency	Labalb	IMARnumber	SAF	CAVI	ABI	BMI	Durationmonth	Ageyear	Hb	HbA1C	Ca	PO4	iPTH	LogB2m	LogHsCRPResult	B2m	HsCRPResult	CAD	CAG	CVA
HD	0	0	X	0	0	1	2	3.9	15.953	1.8	10.4	1.03	22.7365	22	88.4795	12.1	5.5	9	7.7	1174	1.40993	#NULL!	25.7	#NULL!	1	1	0
HDF	1	1	x	0	0	1	3	3.6	17.0243	1.9	8.2	1.33	20.7031	26.9333	49.9534	10.1	5.8	9.6	6.8	750.4	#NULL!	-1.09691	#NULL!	0.08	0	0	0
HD	1	0	x	0	1	1	2	3.7	25.4556	1.9	7.7	1.1	36.6285	18.1333	52.9863	9.7	11.3	8.5	4.6	701	1.43136	0.0334238	27	1.08	1	1	#NULL!
HD	1	0	x	0	0	0	3	3.8	20.3435	2	7	1.08	19.4674	32.5333	40.1973	9.1	4.1	8	6.2	772.9	1.43201	-0.677781	27.04	0.21	0	0	0
HD	1	0	x	0	0	1	3	3.1	15.845	2.2	13.9	0.89	13.634	32.5	73.9479	10.5	8.5	9.4	5.3	409.8	1.61363	0.161368	41.08	1.45	0	0	0
HD	1	0	x	0	0	1	3	3.7	7.91198	2.2	9.7	1.06	18.9619	180.567	48.4548	10.6	5.2	9.2	4.7	285	1.84261	-0.251812	69.6	0.56	0	0	0
HD	1	0	x	0	0	1	3	3.6	17.0796	2.3	#NULL!	#NULL!	21.7784	107.533	57.5342	11.3	5.4	9.4	6.5	442.7	#NULL!	-0.0362122	#NULL!	0.92	0	0	0
HD	1	0	x	0	0	1	2	4.3	39.8858	2.4	6.5	1.1	21.3504	20.1	68.6	15.3	5.5	9.7	5.5	844	1.48841	-1.69897	30.79	0.02	0	0	0
HD	1	0	x	0	0	0	2	3.5	#NULL!	2.5	10.4	1.05	19.3685	12.7333	89.8932	10.7	4.9	9.7	3.9	128	1.30814	-1.22185	20.33	0.06	1	1	0
HD	1	0	X	0	1	1	2	3.9	35.6077	2.5	8.5	1.04	33.7604	21.3667	64.7151	9.9	5.3	9.3	6.3	364	1.57634	-0.522879	37.7	0.3	0	0	0
HD	1	0	x	0	1	1	2	3.5	27.2263	2.6	9.6	1.03	17.6254	8	92.1479	10.5	5.1	8.3	7.2	539	1.36884	-1.09691	23.38	0.08	0	0	0
HD	1	0	x	0	0	1	2	4	36.4226	2.6	9	1.21	19.5651	29.3	81.8877	10.7	5.2	9.1	6.6	915	1.59879	-0.958607	39.7	0.11	0	0	0
HDF	1	1	x	0	0	1	2	3.1	0	2.6	7.6	1.07	14.7656	16.6667	89.274	8.7	#NULL!	6.6	2.5	57.9	1.67237	0.979548	47.03	9.54	0	0	0
HD	0	0	x	0	0	1	2	3.9	2.37236	2.7	9.8	1.31	17.0068	46.3	65.8904	11	5	10.9	6	154	1.42488	-1.1549	26.6	0.07	0	0	0
HD	1	0	x	0	0	1	2	3.8	19.6623	2.9	11	0.92	16.8311	7.6	85.8904	11.4	4.9	10.1	2.9	61.9	1.39111	0.31597	24.61	2.07	0	0	1
HDF	1	1	x	0	0	1	2	3.4	14.3688	2.9	11	1.13	17.7458	12.6667	61.874	11.8	7.8	10.4	3.3	9.5	1.19976	-0.187087	15.84	0.65	0	0	0
HD	1	0	x	0	0	1	3	3.8	24.6926	2.9	9.6	0.99	17.0656	27.0667	78.2685	8.8	#NULL!	10.3	5.7	547.8	1.42308	-1.52288	26.49	0.03	0	0	0
HD	0	0	x	0	0	1	2	3.9	30.0442	3	9.6	1.15	26.897	21.6	74.4685	10.9	5.3	9.3	6.3	1113	#NULL!	#NULL!	#NULL!	#NULL!	1	1	0
HD	1	0	x	0	1	1	3	3.9	21.7223	3	8.4	1.02	17.1762	16.1333	82.8877	11.8	5.7	9.2	5.5	918.9	1.52179	-0.853872	33.25	0.14	0	0	0
HD	1	0	x	0	1	1	3	3.6	23.2743	3.1	9.4	0.81	18.222	26.3667	77.2164	10.5	6.6	8.6	4	702.2	1.2531	-0.79588	17.91	0.16	0	0	1
HD	0	1	x	0	1	1	2	4.1	66.7721	3.2	8	1.19	20.9071	30.0333	42.9534	12.4	7.3	9.1	4.8	#NULL!	#NULL!	#NULL!	#NULL!	#NULL!	0	0	0
HD	1	0	x	0	0	1	3	4.4	23.5579	3.2	7	1.17	19.052	50.7333	47.1836	13	5.5	10.8	4.5	558	1.46583	-1.30103	29.23	0.05	0	0	0
HD	1	0	x	0	1	1	2	3.7	45.9053	3.3	7.3	0.9	18.8	4.26667	74.8822	12.4	5.3	9.4	4.2	516	1.20222	-1.52288	15.93	0.03	1	1	0
HD	0	1	x	0	1	1	2	4	11.583	3.4	9.7	1.18	27.128	16.0667	70.8466	10.2	5.6	8.8	6	306.2	1.46315	-1.09691	29.05	0.08	0	0	0
HD	0	0	x	0	1	1	3	3.9	13.8087	3.4	8.5	1.11	31.8457	28.5	46.1397	11.3	9.2	9.1	4.2	432	1.4609	#NULL!	28.9	#NULL!	0	0	0
HD	1	0	X	0	1	1	3	3.5	25.6771	3.5	12.4	1.12	16.9563	130.8	56.5452	11.3	6.9	9	4.1	204.6	1.53605	-1.52288	34.36	0.03	0	0	0
HD	0	0	X	0	1	1	3	3.4	15.4815	3.5	9.6	1.03	20.6575	30.4	60.7589	13.3	6.1	8.9	3.6	146	1.19033	0.117271	15.5	1.31	1	1	0
HD	0	0	x	0	1	1	3	4.1	28.1146	3.5	8.8	1.32	17.5781	0.1	87.0493	10.4	5.3	9.4	8.3	424.9	#NULL!	-0.49485	#NULL!	0.32	1	1	1
HD	1	0	x	0	0	1	2	3.3	0.973451	3.7	10.5	1.07	21.6413	22.2	79.4247	10.4	4.8	8.3	3.2	394.9	1.54407	-1.69897	35	0.02	1	1	0
HD	1	0	x	0	1	1	2	3.4	25.1235	4	9.2	1.15	18.4898	6.8	83.0959	9.6	5.1	8.4	4.3	593	1.41162	0.0791812	25.8	1.2	0	0	0
HD	0	0	x	0	1	1	3	4.1	23.5418	4.1	8.9	1.09	24.9257	25.5333	67.863	9.9	5.6	7.7	5	414.6	1.43696	-1.09691	27.35	0.08	0	0	0
HD	0	1	x	0	1	1	2	3.8	47.3811	4.3	10.7	1.26	20.2422	12.8667	75.8849	9	5.2	9.8	5.1	355	1.37291	-1.69897	23.6	0.02	0	0	1
HD	0	1	x	0	1	1	2	3.7	15.4461	4.8	10.9	0.76	22.3757	33.4333	69.6932	12.4	5.3	9.4	4.2	516	1.2014	#NULL!	15.9	#NULL!	1	1	0
HD	0	0	x	0	0	0	3	3.1	35.4994	#NULL!	5.6	0.99	23.3091	71	69.6521	11.5	4.8	8.2	3	229.8	#NULL!	#NULL!	#NULL!	#NULL!	0	0	0
HD	1	0	X	0	1	1	2	3.8	40.2473	1.7	8.6	1.01	34.6667	17.8667	50.7452	10.4	8.3	8	6.1	498	1.59106	#NULL!	39	#NULL!	0	0	0
HD	1	0	x	0	0	1	2	4	41.2357	2.1	7.5	1.21	17.5431	4.8	77.4658	12.2	5	8.9	3.8	437	1.44994	-0.744727	28.18	0.18	0	0	0
HD	1	0	x	0	1	1	2	3.5	50.2289	2.4	8.9	1.15	29.9688	25.7667	52.7123	11	7.2	9.4	5	1057	1.56431	-0.0809219	36.67	0.83	0	0	0
HD	1	0	x	0	0	1	2	3.5	42.7547	2.5	9.8	1.12	18.378	4.9	75.4164	10.8	5.2	10.3	4.6	#NULL!	1.59073	#NULL!	38.97	#NULL!	0	0	0
HD	0	0	X	0	1	1	3	3.7	43.1016	2.5	7	1.1	25.2595	33.1667	60.6904	11.7	6.3	9.2	5.6	113.3	1.5231	-0.769551	33.35	0.17	1	1	0
HD	1	0	x	0	0	1	3	3.9	47.6182	2.5	5.1	1.25	14.7959	156.233	69.8795	8.6	5.6	9.5	3.4	526	1.5092	#NULL!	32.3	#NULL!	0	1	0
HD	0	0	x	0	1	1	2	4	50.4526	2.6	10.8	1.31	26.0384	15.6667	63.074	11.5	7.6	9.5	3.9	277	1.46982	-0.522879	29.5	0.3	0	0	1
HD	1	0	x	0	1	1	2	3.5	46.1239	2.6	9.9	1	15.8984	20.1	82.4603	12.1	4.8	9.1	4.1	284.7	1.52827	-0.259637	33.75	0.55	0	0	0
HD	0	0	x	0	0	1	2	4	43.5738	2.6	8.4	1.13	23.0303	33.2	74.9425	11.8	5.6	9.2	3.5	737.3	1.45179	0.130334	28.3	1.35	0	0	1
HD	0	0	x	0	1	1	3	4	49.2327	2.9	7.1	1.06	17.5533	25.3667	59.6521	11.8	6.3	9.2	3.5	1017.8	1.44979	-0.886057	28.17	0.13	1	1	0
HD	0	0	x	0	1	1	2	4.3	48.4562	3	9.5	1.11	21.2963	14.5	51.1151	11.2	4.6	9.4	4.4	190	1.4183	-1.69897	26.2	0.02	0	0	0
HD	1	0	x	0	0	1	2	3.7	38.4126	3.1	9.7	0.88	22.5586	83.1667	78.8849	10.4	5.2	8.5	5.3	1273.1	1.48968	-0.408935	30.88	0.39	1	1	0
HD	1	0	x	0	0	1	3	3.9	41.8142	3.2	8.8	0.99	21.5625	10.1333	81.3479	9.9	5.8	9	5.1	686	1.33846	-1.39794	21.8	0.04	0	0	0
HD	1	0	x	0	0	1	2	3.3	32.8779	3.2	7.9	1.12	24.7443	40	65.1397	9.5	5.7	9.5	3	351	1.45773	-0.886057	28.69	0.13	0	0	0
HD	1	0	X	0	1	1	3	3.8	46.6321	3.2	8.9	0.7	19.9792	20.3333	75.8849	11	6.4	9.9	5.5	212	1.5458	#NULL!	35.14	#NULL!	0	0	0
HD	0	1	x	0	0	1	2	3.5	45.4656	3.3	10.1	1.05	22.0703	5.53333	89.7288	12.2	5.2	9.1	6	259	1.57749	-1.39794	37.8	0.04	0	0	1
HD	0	0	x	0	0	1	2	3.6	56.7932	3.3	8.2	1.14	24.6094	144.067	60.8548	9.2	5	9	3.4	176.4	1.5563	0.187521	36	1.54	1	1	0
HD	0	0	x	0	1	1	2	4	34.8175	3.4	12	0.94	21.6263	58.8333	61.7342	12.1	5.6	9.8	6.1	486	1.56585	-1.69897	36.8	0.02	1	1	0
HD	1	0	x	0	0	1	3	3.2	71.1468	3.5	8.7	1.06	16	16.4667	43.2548	7	4.9	8.3	3.8	220	1.89098	-1.69897	77.8	0.02	0	0	0
HD	1	0	x	0	1	1	2	3.8	28.6237	3.6	9.6	0.97	16.4412	5.66667	77.8849	11.7	6.3	9.2	3.4	358.1	1.51402	-0.920819	32.66	0.12	0	0	0
HD	0	0	X	0	0	1	2	3.9	38.5692	4	8.4	1.18	20.9375	33.5	51.3096	12.3	5.3	9.2	3	1764	1.48572	-1.30103	30.6	0.05	0	0	0
HD	1	0	x	0	1	1	2	4	47.9425	4.1	10.5	1.17	21.4844	33.4333	85.0219	11.2	5.9	10.6	3	45.3	#NULL!	#NULL!	#NULL!	#NULL!	1	1	0
HD	1	0	x	0	0	0	2	3.4	46.8067	4.1	10.4	0.99	22.4766	19.2	80.6301	12.1	5.2	10.9	2	85.9	1.53148	-1.39794	34	0.04	0	0	1
HD	1	0	X	0	0	1	3	3.3	56.9237	4.2	9.5	1.13	20.8889	19	83.1699	9	4.8	8.6	2.2	126.1	1.53237	-0.0655015	34.07	0.86	0	0	0
HD	1	0	x	0	0	1	3	3.8	51.4544	4.3	9.3	1.18	19.0625	16.2667	63.5699	10.2	5.3	9	4.2	341	1.76298	-0.49485	57.94	0.32	0	0	0
HD	1	0	x	0	1	1	3	3.9	71.7239	4.3	#NULL!	#NULL!	28.8754	144.067	55.0329	11.8	5.8	9.9	5.1	488	1.73078	0.232996	53.8	1.71	0	0	0
HD	1	0	x	0	0	1	3	3.6	54.4122	4.6	8	0.69	21.7778	24.8667	84.8904	11.1	5.3	9.3	4.2	1219	1.49969	-0.677781	31.6	0.21	0	0	1
HD	1	0	x	0	0	1	3	3.1	55.3975	4.8	#NULL!	#NULL!	19.563	#NULL!	93.8137	10.8	4.7	8.9	3.5	216.8	1.40295	#NULL!	25.29	#NULL!	1	1	0
HDF	1	1	x	0	1	1	2	4	81.6719	4.9	10.8	1.18	22.8	20.7667	77.8849	12.3	7.7	9.9	4.1	239	1.2878	-1.1549	19.4	0.07	0	0	0
HD	0	1	x	0	1	1	3	3.9	44.9382	#NULL!	10.5	0.68	22.1297	23.2333	43.8575	13.1	7.1	9.4	5.5	850	1.51587	-0.091515	32.8	0.81	0	0	0
HD	1	0	x	0	0	0	2	3.8	64.3891	#NULL!	10.1	1.08	20.4889	2.33333	66.2959	12.6	8	9.3	3.2	342	#NULL!	#NULL!	#NULL!	#NULL!	0	0	0
HD	0	1	x	0	1	1	3	3.9	49.5055	#NULL!	8.8	1.19	22.4913	23.6667	56.3945	11.9	5.7	8.1	5.5	713.1	1.36754	-1.09691	23.31	0.08	1	1	0
HD	0	1	x	0	0	1	2	3.9	49.4368	#NULL!	8.8	1.27	24.677	15.9667	43.463	11.9	6	10.1	4.4	77	1.47567	#NULL!	29.9	#NULL!	0	0	0
HD	0	0	x	0	0	1	2	4.3	45.2256	#NULL!	7.3	1.21	23.3887	12.2333	49.7342	11	5	9.9	7.7	207	1.59329	-1.39794	39.2	0.04	0	0	0
HD	1	0	x	0	0	1	2	3.1	21.2161	1.7	#NULL!	#NULL!	17.5111	10.1333	82.3452	10.8	7.8	8.8	4.5	251	1.39445	-1.39794	24.8	0.04	1	1	0
HD	1	0	x	0	1	1	3	3.4	45.3887	2.1	8.3	1.25	19.2716	29.7667	78.0274	11.6	5.3	9.8	5.3	1288.2	1.717	-0.677781	52.12	0.21	1	0	0
HD	1	0	x	0	1	1	3	4.1	60.625	2.2	8.5	0.71	22.8889	89.3	77.5014	11.6	6.8	10	5.4	511	1.56937	#NULL!	37.1	#NULL!	0	0	0
HD	0	0	x	0	1	1	2	3.6	55.0818	2.3	10.9	1.08	20.9042	#NULL!	87.8932	11.7	5.9	8.4	3.6	594.9	1.59106	-1.69897	39	0.02	1	0	0
HD	1	0	x	0	1	1	3	3.1	35.3514	2.4	10.1	1	27.9421	28.5333	58.5808	11.7	8.5	11.1	6.3	1418.1	#NULL!	-0.167491	#NULL!	0.68	0	0	0
HD	0	1	x	0	0	0	3	3.6	60.1786	2.4	7.3	1.04	22.1003	22.3	51.3973	12	5.2	8.6	4	1243	1.78219	0.478566	60.56	3.01	0	0	0
HD	0	1	x	0	1	1	2	3.7	62.7027	2.6	11.2	1.1	24.4646	27.8667	83.0329	10	5.3	9.6	4.1	627	1.47712	#NULL!	30	#NULL!	0	0	0
HDF	1	1	x	0	0	1	3	3.4	56.2211	2.6	8.8	0.99	18.6268	34.0333	56.1123	7.9	5.1	8.9	4.2	298.1	1.69469	-0.244125	49.51	0.57	0	0	0
HD	1	0	x	0	1	1	2	4.1	59.841	2.6	8.6	1.14	21.5609	1.43333	61.5753	12.8	5.3	8.4	6.5	346	1.5563	-0.920819	36	0.12	0	0	0
HD	1	0	x	0	0	1	3	3.8	58.6443	2.6	6.7	1.12	22.0317	1.5	43.6575	8.4	4.7	8.7	2.9	379.5	#NULL!	#NULL!	#NULL!	#NULL!	0	0	0
HD	0	0	x	0	1	1	2	3.6	55.0818	2.6	#NULL!	#NULL!	26.0933	21.3667	80.7096	10.1	5.6	10.4	2.9	773	1.42813	-1.04576	26.8	0.09	0	1	0
HD	1	0	x	0	0	1	3	3.7	60.2051	2.7	8.6	0.92	24.974	14.1333	83.2438	10.6	4.8	9.5	4.4	254	1.29667	-1.22185	19.8	0.06	0	0	0
HD	1	0	x	0	1	1	3	3.6	36.8667	2.9	9.1	0.88	26.3702	29	82.7644	10.9	6.1	9.5	4.6	430.7	1.35698	-0.657577	22.75	0.22	1	1	0
HD	0	0	X	0	0	1	2	4.1	#NULL!	3.1	9.7	0.94	23.03	19.0333	62.3479	15.1	6.1	9.9	5.4	363	1.52763	-0.920819	33.7	0.12	0	0	0
HD	0	1	x	0	1	1	3	3.7	38.4126	3.1	8.9	1.18	25.7117	7.7	62.8959	10.2	5.65	9.6	6.4	549	#NULL!	#NULL!	#NULL!	#NULL!	0	0	0
HD	1	0	x	0	1	1	2	4.3	43.5073	3.1	8.7	0.87	30.1315	23.2	75.0438	12	7	10	4.6	246	1.21219	-1	16.3	0.1	0	0	0
HD	1	0	x	0	0	1	2	3.7	#NULL!	3.1	#NULL!	#NULL!	26.5705	16.2667	77.8849	10.1	5.5	10.3	3.8	238	1.50243	-1.39794	31.8	0.04	0	0	0
HD	1	0	x	0	1	1	2	3.6	48.2229	3.2	9.8	1.03	22.0166	12.4333	83.8904	10.7	5.6	9	4.5	264	1.15229	-0.823909	14.2	0.15	0	0	0
HD	1	0	x	0	1	1	2	3.2	41.2848	3.2	#NULL!	#NULL!	20.5469	35.5	86.8384	11.4	5.6	9.1	3.6	346.6	1.33062	-1.22185	21.41	0.06	0	0	0
HD	1	0	X	0	0	1	2	4.3	47.6681	3.4	8.8	1.09	20.8889	30.0667	82.8877	11.3	5.3	9.3	6	1618	1.47712	-1.39794	30	0.04	0	0	0
HD	1	0	x	0	1	1	3	3.9	43.2739	3.4	7.8	0.96	21.2032	115.7	39.9014	11.7	6.6	8.4	3.3	22.8	1.46538	#NULL!	29.2	#NULL!	0	0	0
HD	1	0	x	0	1	1	2	4.2	52.0374	3.4	#NULL!	#NULL!	23.7253	38	78.1342	10.2	6.5	9.4	3.8	203	1.45179	-0.0861861	28.3	0.82	0	0	0
HD	0	1	x	0	1	1	2	3.4	26.4006	3.4	9.2	0.87	22.0703	28.6333	82.5616	9.9	5.7	8.5	7	78	#NULL!	#NULL!	#NULL!	#NULL!	0	0	0
HD	1	0	x	0	1	1	3	3.6	55.7907	3.5	9.5	0.96	28.1065	37.5333	66.2493	11.9	8.3	10.5	5.4	224.3	1.38453	-0.920819	24.24	0.12	0	0	0
HD	0	0	x	0	1	1	2	4.1	57.2811	3.6	8	1.02	25.7812	8.3	59.7808	11.4	6.9	10	3.2	97	1.03743	-1.04576	10.9	0.09	0	0	0
HD	0	0	x	0	1	1	2	4.2	50.9402	3.7	13.1	1.08	17.8748	5.9	72.811	12.7	5.2	10.5	4.8	93	1.51121	-0.0268721	32.45	0.94	0	0	1
HD	0	0	x	0	0	0	2	2.4	4.375	4.5	10.6	1.03	22.6644	23.6667	79.7616	12.8	5.4	8.2	5.4	454	1.5989	-1.69897	39.71	0.02	0	0	0
HD	1	0	x	0	0	1	3	3.8	#NULL!	4.9	9.9	0.71	19.3965	34.4667	74.8822	11.6	5.3	9	4.4	#NULL!	1.625	-0.119186	42.17	0.76	0	0	0
HD	1	0	x	0	0	1	2	3.9	41.0148	5	9.7	1	18.9778	34.4667	84.8904	12	5.3	8.9	4	651	#NULL!	-0.823909	#NULL!	0.15	1	1	0
HD	0	0	x	0	1	1	2	2.9	25.8631	#NULL!	14.3	0.81	15.3979	0.433333	82.0548	9.2	7.2	9.6	3.1	237	1.43136	#NULL!	27	#NULL!	1	1	0
HDF	1	1	X	0	0	1	3	2.8	17.0676	#NULL!	11.7	0.88	19.5882	21.9667	61.7068	9.6	6.5	8.7	4.7	242	1.46464	-0.677781	29.15	0.21	0	0	0
HD	1	0	x	0	1	1	3	3.3	41.914	#NULL!	12.7	0.87	19.3426	63.9667	79.8877	11.3	9.2	8.4	3	347.4	1.53832	-0.769551	34.54	0.17	1	0	1
HD	0	0	x	0	0	1	2	3.9	59.0179	#NULL!	9.7	0.67	19.5312	46.6667	92.3342	11.9	5.3	10.6	4.6	376	1.42732	-0.920819	26.75	0.12	0	0	0
HD	0	0	x	0	1	1	2	3.8	40.4665	#NULL!	9.4	0.95	24.1447	11.7667	59.789	10.7	7.4	9.1	7.1	404.3	#NULL!	#NULL!	#NULL!	#NULL!	1	0	0
HD	1	0	x	0	1	1	3	3.8	38.5618	#NULL!	7.6	1.33	18.7471	12.6333	79.1151	10.7	5.6	9.1	7.1	676	1.31218	-1.52288	20.52	0.03	1	1	0
HD	0	1	x	0	0	1	3	3.9	32.1846	#NULL!	7.4	1.24	24.2939	10.9	56.7288	11.3	5.4	9.1	3.8	1962	1.49136	-0.853872	31	0.14	0	0	0
HD	1	0	x	0	1	1	3	3.7	54.209	#NULL!	6.6	1.03	27.5482	152.533	66.8493	11.1	5.5	9	5.7	896.9	1.42894	-0.585027	26.85	0.26	0	0	0
HD	1	0	x	0	0	1	3	3.6	49.4843	1.8	8.5	1.25	19.8286	30.7	84.4247	11.5	5.5	9	5.8	431.8	1.48044	-0.769551	30.23	0.17	0	0	0
HD	0	0	x	0	0	0	2	3.2	43.2681	2	10.4	1.19	0	12.8667	82.8877	10.6	4.9	8.8	3.7	233.1	1.58263	-1.1549	38.25	0.07	0	0	0
HD	0	0	x	0	0	1	2	4	50.4843	2	8.2	1.28	23.147	15.9667	65.0548	11.4	5.5	8.9	4.4	650.6	1.25575	-1.04576	18.02	0.09	0	0	0
HD	0	1	x	0	1	1	2	3.7	41.4515	2	8.1	0.97	17.3828	9.2	53.9479	10.9	6.6	8.2	4.3	340	1.58546	-0.187087	38.5	0.65	0	0	0
HD	0	0	X	0	1	1	2	3.2	16.0774	2.2	11.7	1.16	17.1072	11.8333	84.8904	8.2	4.8	8	7	929	#NULL!	-0.327902	#NULL!	0.47	0	0	0
HD	0	1	x	0	1	1	2	4	37.7395	2.2	11.2	1.02	25.4694	40.6	85.8192	11.9	5.9	9.7	3.6	63	1.04139	#NULL!	11	#NULL!	0	0	0
HD	1	0	x	0	1	1	2	3.9	20.6105	2.2	8.5	1.15	22.4766	16.4667	34.0685	11.5	8.1	9.7	3.6	307	#NULL!	-1.30103	#NULL!	0.05	0	0	0
HD	0	0	x	0	0	1	3	3.6	30.6583	2.3	9	1.19	18.9164	43.2333	62.8274	12.6	4.6	9.4	4	995.8	1.4609	-1.30103	28.9	0.05	0	0	0
HD	0	1	x	0	0	1	2	4.3	41.2051	2.3	8.4	1.19	20.8653	16.9667	#NULL!	12.8	6.5	9.9	4.8	184	1.18752	-1.04576	15.4	0.09	1	0	0
HD	0	0	X	0	0	1	2	3.8	36.0775	2.4	9.7	1.02	20.2734	5.43333	65.8767	12.5	6.7	8.4	2.9	267.6	#NULL!	0.193125	#NULL!	1.56	0	0	0
HD	1	0	x	0	0	1	3	3.2	29.2548	2.5	11.1	0.81	16.2278	14.2	78.9534	12.2	5.6	9.1	7.2	400	1.67486	-0.356547	47.3	0.44	1	0	0
HD	0	1	x	0	1	1	2	3.6	24.0472	2.5	10.1	1.14	22.8057	6.13333	59.874	10.3	8	9.4	1.7	31	1.53908	#NULL!	34.6	#NULL!	0	0	0
HD	1	0	X	0	1	1	2	4.6	49.1783	2.6	10.8	0.96	15.6107	11.1333	45.7233	12.5	6	9.8	2.9	84	1.43377	#NULL!	27.15	#NULL!	1	1	0
HD	1	0	X	0	1	1	3	4	42.3024	2.7	9.1	1.12	23.8549	32.6667	62.3425	14.4	5.2	9.8	7	229	1.50515	-0.958607	32	0.11	1	1	1
HD	1	0	x	0	1	1	3	3.8	44.8555	2.8	10.2	1.19	23.2444	15.6667	51.6027	11.3	8.4	9.4	3.8	88.1	#NULL!	-0.619789	#NULL!	0.24	0	0	0
HD	1	0	x	0	0	1	2	3.6	30.035	2.8	9.1	1.11	20.4618	6.43333	63.8767	10.8	5	7.9	6.2	497	1.55703	-0.823909	36.06	0.15	0	0	0
HD	0	1	x	0	1	1	3	4.5	51.7552	2.9	9.9	0.69	19.487	54.7	66.7945	10.8	7.6	9.5	6.1	365	1.47276	-1.30103	29.7	0.05	0	0	0
HD	0	1	x	0	1	1	2	4	41.7124	2.9	9.1	1.25	23.2812	17.0333	52.2904	9.5	6.4	9.2	6.8	551	1.49693	0.416641	31.4	2.61	0	0	0
HD	0	0	x	0	0	1	3	3.5	44.1748	2.9	8.8	0.84	25.8525	133.3	70.674	10.4	6.1	9	3.8	913.2	1.44963	-0.148742	28.16	0.71	1	1	0
HD	0	0	x	0	1	1	2	3.3	32.9243	2.9	#NULL!	#NULL!	20.1189	7.7	63.8767	10.3	6.2	8.8	2.3	200.9	1.48501	-0.853872	30.55	0.14	1	1	0
HDF	1	1	x	0	1	1	2	4.6	41.8585	3	#NULL!	#NULL!	14.5682	15.6	88.2603	10.5	6.1	10.2	5.1	296	1.38021	-1.52288	24	0.03	0	0	0
HD	1	0	x	0	1	1	2	3.8	43.9	3.1	8.3	1.04	24.7768	0.333333	61.8384	10.3	7.1	10	4	289	#NULL!	#NULL!	#NULL!	#NULL!	0	0	0
HDF	1	1	x	0	0	1	3	3.5	12.7512	3.3	10	1.24	24.6385	43.5667	69.0548	13.4	5.1	9.1	6.3	246	1.58343	-1.04576	38.32	0.09	1	0	0
HD	0	1	x	0	0	1	2	3.6	22.0367	3.3	8.5	1.18	21.2585	95.3667	79.4959	11.1	5	8.5	4	560	1.60097	#NULL!	39.9	#NULL!	0	0	0
HD	1	0	x	0	1	1	2	4.5	40.5315	3.4	9	1.05	31.8168	1.76667	65.6658	13.1	6.3	10.7	6.6	1070	#NULL!	0.260071	#NULL!	1.82	0	0	0
HD	1	0	x	0	1	1	2	3.8	25.1463	3.4	7.6	1.11	22.8928	2.93333	65.8767	8.8	6.2	8.9	6.2	645	1.50243	-0.958607	31.8	0.11	1	1	0
HDF	1	1	x	0	1	1	2	3.3	8.22632	3.5	9.2	1.14	20.7163	2.86667	52.7973	10.8	4.9	8.2	4.9	1256.6	1.57795	#NULL!	37.84	#NULL!	0	0	0
HD	1	0	x	0	1	1	3	3.5	36.3077	3.7	13.5	0.72	19.0667	0.533333	78.8849	11.7	7.2	9.3	4.2	465	1.50215	#NULL!	31.78	#NULL!	0	0	0
HD	0	1	x	0	0	1	3	4.2	58.9486	3.9	9.7	1.13	19.7523	43.0667	66.4082	10.7	4.9	8.8	3.6	334	1.6149	#NULL!	41.2	#NULL!	1	0	0
HD	0	0	x	0	0	1	2	3.2	75.9167	5.7	#NULL!	#NULL!	18.2157	131.867	75.0493	12	5.1	9.4	6.7	288	1.5832	#NULL!	38.3	#NULL!	0	0	0
HD	0	1	x	0	1	1	3	3.4	28.4183	#NULL!	12.1	1.26	22.7839	28.6333	62.0712	10.6	9.8	9.3	5.4	#NULL!	1.52257	0.00432137	33.31	1.01	1	1	0
HD	0	1	x	0	1	1	2	3.4	33.1386	#NULL!	12.3	1.02	26.8889	11.4667	84.8192	10.1	9.5	8.6	3.1	319	1.35793	#NULL!	22.8	#NULL!	1	1	1
HD	0	0	x	0	1	1	3	4.2	37.7429	#NULL!	10.5	1.14	22.2146	26.6333	72.6247	10	9.3	9.8	7.1	391	1.44716	-1.52288	28	0.03	0	0	0
HD	0	1	x	0	1	1	3	4	#NULL!	#NULL!	7.3	0.97	22.232	33.4333	57.7123	11.7	6.9	8.5	4.7	984	1.51375	#NULL!	32.64	#NULL!	0	0	0
HD	1	0	X	0	1	1	3	4.2	23.3436	#NULL!	8.7	1.07	19.1467	12.6667	55.474	14.6	8.1	10.5	3.4	157	1.17377	-0.823909	14.92	0.15	1	0	0
HD	0	0	x	0	1	1	2	4.2	45.2066	1.5	10.3	0.8	19.2653	14.2	87.2548	14.7	5.1	10.5	3.4	#NULL!	1.44091	#NULL!	27.6	#NULL!	1	1	0
HD	1	0	x	0	1	1	3	3.7	34.6465	1.8	11	1.03	23.3984	16.3	83.2329	12.2	5	8.8	4.4	795	1.48926	-1.69897	30.85	0.02	0	0	0
HD	0	0	x	0	1	1	2	3.3	40.6192	1.9	10.6	0.89	28.6505	7.13333	64.8767	11.3	7.4	9.7	2.8	63	1.24724	#NULL!	17.67	#NULL!	0	0	0
HD	1	0	X	0	1	1	3	3.7	#NULL!	1.9	9	1.01	30.3434	28.8667	63.8767	10.8	5.5	8.6	5.5	3.8	1.58771	-0.0555173	38.7	0.88	1	0	1
HD	0	0	X	0	1	1	3	3.6	41.7162	1.9	#NULL!	#NULL!	20.7266	5.33333	62.6795	10.1	4.6	8.4	3.6	1026.6	1.58297	-0.721246	38.28	0.19	0	0	1
HD	0	0	x	0	0	0	3	4.9	55.8141	2.1	7.3	1.03	21.7301	42.3333	33.4822	14.4	4.8	8.6	2.5	598	1.35199	#NULL!	22.49	#NULL!	0	0	0
HD	0	0	x	0	0	1	3	3.5	#NULL!	2.1	7	1.04	20.8304	39.5667	49.3562	10.1	5.4	8.4	4.2	#NULL!	#NULL!	#NULL!	#NULL!	#NULL!	1	1	0
HD	1	0	x	0	1	1	3	4.4	51.0418	2.2	#NULL!	#NULL!	0	0.533333	78.8849	9.2	6.7	9	2.2	26.8	#NULL!	#NULL!	#NULL!	#NULL!	0	0	0
HD	0	0	X	0	0	1	2	4.1	36.5728	2.3	6.9	1.21	23.9853	17.0333	72.6658	9.2	5.9	8	6.1	518	1.29885	-1.52288	19.9	0.03	1	0	0
HD	0	0	x	0	1	1	2	4.2	35.4189	2.4	9.8	1.08	20.2734	9.4	76.8301	11.8	6.8	9.5	6.3	338	1.52892	-0.79588	33.8	0.16	0	0	0
HD	0	0	x	0	0	1	3	3.7	31.721	2.4	8.9	1.15	23.5547	43.3667	60.4932	11.5	5.4	8.6	4.5	1076.9	1.42095	#NULL!	26.36	#NULL!	1	0	0
HD	1	0	x	0	1	1	3	3.3	28.973	2.5	10.3	1.1	21.8106	22.3	72.8822	10	7	9.2	3.3	740	1.44091	-0.585027	27.6	0.26	1	1	0
HD	1	0	x	0	0	1	2	3.8	#NULL!	2.5	6.9	1.24	22.5981	2.53333	61.8795	8.7	5.2	9.4	3.2	1023	#NULL!	#NULL!	#NULL!	#NULL!	0	0	0
HD	1	0	x	0	1	1	3	4	35.2675	2.5	6.9	0.76	22.6667	32.9333	70.8795	12	6.9	9.8	2.8	505	1.61805	#NULL!	41.5	#NULL!	0	0	0
HD	1	0	x	0	1	1	3	4.1	35.8609	2.6	11.8	1.04	20.3616	9.93333	75.8849	14.3	5.8	9.8	5.9	293	1.48586	-1.30103	30.61	0.05	1	1	0
HD	0	0	x	0	0	1	2	3.2	22.5346	2.6	10.5	1.18	28.3594	8.8	67.8795	10.5	5	9.2	3	708	#NULL!	#NULL!	#NULL!	#NULL!	0	0	0
HD	0	0	x	0	1	1	2	4.2	41.7606	2.6	7.7	1.32	21.4711	0.1	75.6329	10.7	#NULL!	9.8	3.4	33.8	1.56714	-1.09691	36.91	0.08	1	1	1
HDF	1	0	X	0	1	1	2	3.9	35.5343	2.7	7.1	0.69	27.5556	7.33333	70.8795	10.7	5	9.6	2.9	601.9	1.42472	-1.52288	26.59	0.03	0	0	0
HDF	1	0	x	0	1	1	3	3.7	35.3367	2.8	8.5	1.13	36.5333	4.03333	55.9699	13.9	8	10	6.3	155.5	1.48244	-0.769551	30.37	0.17	1	0	0
HDF	1	1	x	0	1	1	3	4.1	38.0264	2.9	8	1.12	24.7221	41.3	78.8849	12	5.5	9.1	3.2	334	#NULL!	-1.69897	#NULL!	0.02	1	1	1
HD	0	1	x	0	1	1	2	3.5	31.468	2.9	#NULL!	#NULL!	22.4691	10.4667	86.5397	10.1	6.4	9	3.5	359	1.58149	#NULL!	38.15	#NULL!	1	1	#NULL!
HD	0	0	x	0	0	1	3	3.1	23.6452	3	11.9	0.99	20.5061	10.9	68.6411	8.5	6.9	9	3.5	#NULL!	#NULL!	#NULL!	#NULL!	#NULL!	0	0	0
HDF	1	0	x	0	1	1	3	3.1	32.6295	3	8.9	1.07	25.8876	42.0333	74.8822	8.5	4.8	9	3.5	130.3	1.52022	#NULL!	33.13	#NULL!	1	1	0
HDF	1	0	X	0	0	1	2	3.1	15.1316	3.1	9.6	1.2	23.7253	13.5333	86.2	10.5	3.9	9	4.4	239	1.44994	-0.0222764	28.18	0.95	0	0	0
HDF	1	0	x	0	1	1	2	3.9	38.9958	3.2	10.6	1.18	18.9453	2.43333	88.6904	10.8	5.2	9.4	3.8	72.9	#NULL!	#NULL!	#NULL!	#NULL!	0	0	0
HDF	1	0	x	0	1	1	3	3.9	37.0624	3.2	10.3	1.1	20.4043	12.2	70.9836	9.8	7.5	9.1	3.6	977	1.39445	#NULL!	24.8	#NULL!	1	1	0
HDF	1	0	x	0	0	1	3	3.6	34.723	3.2	9.1	1.17	26.2574	18.4	52.3945	12	5.6	9.2	3.3	219.8	1.39428	-0.585027	24.79	0.26	0	0	0
HD	0	0	X	0	0	1	2	4	38.3926	3.3	9.9	1.03	24.9851	9.96667	76.0329	10.7	5.6	8.6	4.9	252	1.4908	-0.366532	30.96	0.43	1	0	#NULL!
HDF	1	0	X	0	1	1	2	4.2	38.4595	3.3	9.6	1.08	20.3906	17.4333	84.8904	11.4	7.6	8.8	7.5	308	1.47567	#NULL!	29.9	#NULL!	0	0	0
HD	0	1	x	0	1	1	3	3.9	69.6195	3.4	13	0.94	25.9879	38.3667	61.5123	9.8	9.8	10.2	7.5	1261	1.4606	-0.638272	28.88	0.23	1	1	0
HDF	1	0	x	0	1	1	3	3.4	20.3307	3.6	10.5	0.92	23.1426	20.0667	67.8795	10.6	6.3	9.2	3.3	306	1.54407	#NULL!	35	#NULL!	1	1	0
HD	0	0	x	0	1	1	3	3.5	33.5529	3.7	12	0.71	17.8145	30.2	86.7863	9.6	5.5	8.9	2	86	1.61034	-0.200659	40.77	0.63	1	1	0
HD	0	1	x	0	1	1	2	3.7	31.4909	3.7	9.6	1.04	30.0444	7.13333	78.8849	10.5	6.9	9	3.8	100.7	0.93044	-1.39794	8.52	0.04	1	1	0
HD	0	1	x	0	1	1	3	3	7.88378	3.7	10.4	1.23	22.2041	10.6333	59.8192	11.7	8.1	8.7	3.6	181.8	1.17435	-0.823909	14.94	0.15	0	0	0
HD	0	1	x	0	1	1	3	3.8	34.51	3.8	7.6	1.03	23.6332	0.7	66.9616	12.6	5.3	8.2	6.3	396.7	1.54045	#NULL!	34.71	#NULL!	1	1	0
HDF	1	0	x	0	1	1	3	3.8	37.6465	3.9	9.5	1.15	29.6053	29.7667	63.7781	12.6	7.9	8.2	6.3	765.1	1.40071	-0.130768	25.16	0.74	0	0	0
HDF	1	0	x	0	1	1	3	3.5	42.7771	4.1	7.1	0.63	30.7111	9.23333	67.2301	11.3	4.7	8	6.1	1389.5	1.58286	-0.0555173	38.27	0.88	1	0	0
HD	0	0	x	0	0	1	3	3.6	38.6167	4.5	10.4	1.08	23.9995	33.7	80.1425	9.2	5.2	8.6	4.4	50.5	1.51282	#NULL!	32.57	#NULL!	0	0	0
HD	0	0	x	0	1	1	3	3.6	43.3667	4.7	9.1	1.11	26.4915	27.4	60.4959	9.2	8.5	8.6	4.4	#NULL!	1.43377	#NULL!	27.15	#NULL!	0	0	0
HD	0	0	x	0	0	0	3	3.6	36.6583	4.8	10.5	1.29	25.8286	60.7667	65.2192	10.3	5.5	8.5	6.5	969	1.43169	-0.638272	27.02	0.23	1	1	0
HD	0	0	x	0	0	1	3	3.8	38.3342	4.8	8.8	1	32.4219	31.9	76.189	10.3	5.9	8.6	3.3	472	1.64385	-1.39794	44.04	0.04	1	1	0
HD	0	0	x	0	1	1	3	3.7	34.3973	5	10.3	1.25	28.7197	38.9333	70.6603	10.2	6.9	9.2	5.5	312.6	1.38382	-0.49485	24.2	0.32	1	1	0
HD	0	1	x	0	0	1	2	3.3	26.4	#NULL!	10.3	1.22	29.103	32.2667	59.8603	10.1	9	8.6	2.1	297.6	1.61479	-0.420216	41.19	0.38	0	0	0
HD	0	0	x	0	0	1	3	3.7	43.3162	#NULL!	10.2	1.19	25.4393	5	64.7507	8.6	5.5	9	5.5	504	1.46982	#NULL!	29.5	#NULL!	0	0	0
HDF	1	0	X	0	0	1	3	3.6	#NULL!	#NULL!	10.2	1.01	30.7612	134.333	42.7808	11.3	4.6	10	2.1	214.5	1.45133	#NULL!	28.27	#NULL!	0	0	0
HD	0	0	x	0	1	0	3	2.3	-4.88261	#NULL!	9.6	1.36	21.1203	13.6333	57.2904	8.7	8.6	8.3	3	100	1.42975	#NULL!	26.9	#NULL!	0	0	0
HD	0	1	x	0	0	1	3	2.7	11.8222	#NULL!	9.3	1.04	28.2477	#NULL!	79.8877	9	7.5	10	5.2	14.9	1.63659	0.311754	43.31	2.05	0	0	0
HD	0	0	x	0	0	1	2	2.8	17.7036	#NULL!	9	1.22	23.6713	2.2	52.1616	8.7	4.5	8.7	3.9	570	1.59802	0.789581	39.63	6.16	0	0	0
HD	0	0	x	0	1	1	2	3.5	38.7057	#NULL!	7.4	1.19	28.7211	10.8667	73.5507	8.9	5.3	9	4.4	604.1	1.48487	-0.568636	30.54	0.27	1	1	0
HD	0	0	x	0	0	1	3	3.9	39.4154	#NULL!	7.1	1.06	19.2042	92.6333	63.9534	12.6	4.4	9.6	3.2	235	1.58252	-1.39794	38.24	0.04	0	0	0
HD	0	0	x	0	1	1	3	3.7	44.4108	#NULL!	#NULL!	#NULL!	15.7422	58.8333	82.9123	10.6	5.4	9.4	3.8	96.5	#NULL!	#NULL!	#NULL!	#NULL!	0	0	1
HD	0	0	x	0	0	1	2	4.1	47.4561	#NULL!	9.3	0.98	19.7551	0.6	83.0986	11.5	5.5	9.8	3.5	315	1.3784	-0.619789	23.9	0.24	0	0	0
HD	0	0	x	0	1	0	2	3.8	42.2421	#NULL!	10.3	0.85	21.2615	1.23333	74.2904	13.5	8	9.3	3.2	342	#NULL!	-1	#NULL!	0.1	1	#NULL!	#NULL!
HD	0	0	x	0	1	1	3	3.5	#NULL!	#NULL!	9.3	1.09	17.5533	25.3667	59.6521	13.5	6	8.7	6.1	444.7	1.63619	0.187521	43.27	1.54	1	1	0
HDF	1	0	x	0	1	1	3	3.5	29.1057	3.7	9.1	0.98	22.3101	5.53333	76.8849	9.2	5.5	8.5	2.5	587	1.5302	-0.167491	33.9	0.68	1	0	0
HDF	1	0	x	0	1	1	2	4.1	34.2488	2.6	9.6	1.14	22.5896	3.2	66.5479	10.6	8.5	9.1	4.6	590	1.39445	-1	24.8	0.1	0	0	0
